# Supplementary material for: All-metallagermoxane with an adamantanoid cage structure: [(Cp*Ru(CO)2Ge)4(μ-O)6] (Cp* = η5-C5Me5)
Source: Royal Society of Chemistry journal article supplement (doi:10.1039/c5dt03284a), 2015-01-01
Supplement: c5dt03284a1.pdf [file c5dt03284a1.pdf]

## Supporting Information

### All metallagermoxane with an adamantanoid cage structure: [(Cp\***Ru**(CO)<sub>2</sub>Ge)<sub>4</sub>(μ-O)<sub>6</sub>] (Cp\* = η<sup>5</sup>-C<sub>5</sub>Me<sub>5</sub>)

K. Bakthavachalam, K. Yuvaraj, Bijan Mondal, Rini Prakash and Sundargopal Ghosh\*

Department of Chemistry,  
Indian Institute of Technology Madras,  
Chennai 600 036, India.  
Fax: 91-44-2257 4202  
Email: [sghosh@iitm.ac.in](mailto:sghosh@iitm.ac.in)

#### Table of Contents

##### **I Solid state X-ray structure and spectroscopic data of **2****

|           |                                                                                                                         |
|-----------|-------------------------------------------------------------------------------------------------------------------------|
| Figure S1 | Molecular structure of <b>2</b> .                                                                                       |
| Figure S2 | C–H...π interaction of compound <b>2</b> , (color code: C: gray; O: red; Ge: black, Ru: green; H: gray, toluene: blue). |
| Figure S3 | <sup>1</sup> H NMR spectrum of <b>2</b> .                                                                               |
| Figure S4 | <sup>13</sup> C NMR spectrum of <b>2</b> .                                                                              |
| Figure S5 | IR spectrum of <b>2</b> .                                                                                               |
| Figure S6 | Mass spectrum of <b>2</b> .                                                                                             |

##### **II Computational details**

|           |                                                                                                                                                                                                                                                                                                               |
|-----------|---------------------------------------------------------------------------------------------------------------------------------------------------------------------------------------------------------------------------------------------------------------------------------------------------------------|
| Figure S7 | Electrostatic potential analysis of <b>2'</b> , <b>2<sup>S</sup></b> (S-analogue of <b>2</b> ) and <b>2<sup>Se</sup></b> (Se-analogue of <b>2</b> ).                                                                                                                                                          |
| Figure S8 | Computed Kohn–Sham (KS) MO of intermediate <b>B</b> , showing π-bond orthogonal to the Ge <sub>2</sub> Ru <sub>2</sub> plane (HOMO), slipped π orbital (HOMO-1) that lies in the Ge <sub>2</sub> Ru <sub>2</sub> plane and the LUMO+1 and LUMO represents the antibonding counterparts of these two orbitals. |

|            |                                                                                                                                                                                                                                                                                                |
|------------|------------------------------------------------------------------------------------------------------------------------------------------------------------------------------------------------------------------------------------------------------------------------------------------------|
| Figure S9  | Key natural bond orbitals of <b>B</b> , showing (a) $\sigma(\text{Ge-Ge})$ , (b) and (c) $\pi(\text{Ge-Ge})$ bonding interactions.                                                                                                                                                             |
| Figure S10 | Cyclic voltammogram and differential pulse voltammogram (inset) for <b>2</b> in $\text{CH}_3\text{CN}$ containing $10^{-4}$ M $[\textit{n}\text{-Bu}_4\text{NPClO}_4]$ . The cyclic voltammogram and the differential pulse voltammogram are scanned from 0 to 2 V at a scan rate of 0.10 V/s. |
| Scheme S1  | Syntheses of tetrametallagermoxane, <b>2</b> . Key reagents: a) K metal (4.2 equiv), thf, rt, 48 h; b) $\text{O}_2$ , thf, rt, 10 min.                                                                                                                                                         |
| Scheme S2  | The calculated $\Delta G$ for each step of the proposed reaction pathway.                                                                                                                                                                                                                      |

### III Supplementary Data

|            |                                                                                                                                                                                                                                                                                                       |
|------------|-------------------------------------------------------------------------------------------------------------------------------------------------------------------------------------------------------------------------------------------------------------------------------------------------------|
| Table S1   | Calculated natural charges ( $q_{\text{Ru}}$ , $q_{\text{Ge}}$ , and $q_{\text{E}}$ ), natural valence population (Pop), HOMO – LUMO gaps and vertical ionization potential ( $\text{IP}_v$ ) of <b>2'</b> , <b>2<sup>S</sup></b> and <b>2<sup>Se</sup></b> . The chalcogen atoms are indicated by E. |
| Figure S11 | Optimized geometry of <b>1'</b> .                                                                                                                                                                                                                                                                     |
| Figure S12 | Optimized geometry of <b>A</b> .                                                                                                                                                                                                                                                                      |
| Figure S13 | Optimized geometry of <b>B</b> .                                                                                                                                                                                                                                                                      |
| Figure S14 | Optimized geometry of <b>C</b> .                                                                                                                                                                                                                                                                      |
| Figure S15 | Optimized geometry of <b>2'</b> .                                                                                                                                                                                                                                                                     |
| Figure S16 | Optimized geometry of <b>2<sup>S</sup></b> .                                                                                                                                                                                                                                                          |
| Figure S17 | Optimized geometry of <b>2<sup>Se</sup></b> .                                                                                                                                                                                                                                                         |

## I Solid state X-ray structure and spectroscopic data of 2

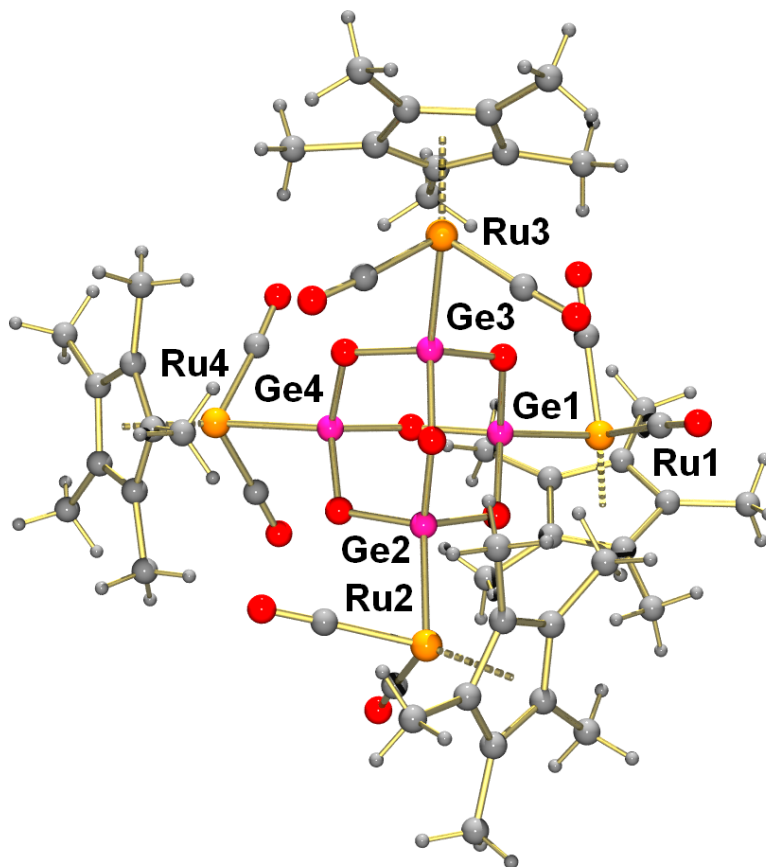

**Figure S1.** Molecular structure of **2**. Selected bond lengths (Å) and angles (°): O9–Ge2 1.787(5), O9–Ge1 1.798(5), O10–Ge2 1.797(5), O10–Ge3 1.797(5), O11–Ge4 1.790(5), O11–Ge3 1.793(5), O12–Ge1 1.795(5), Ge1–Ru1 2.3960(11), Ge2–Ru2 2.4042(11), Ge3–Ru3 2.3993(11), Ge4–Ru4 2.4021(11); O13–Ge1–O9 104.2(2), O12–Ge1–Ru1 115.62(17), O9–Ge1–Ru1 112.40(17), O9–Ge2–O10 104.4(2), O9–Ge2–Ru2 113.72(16), O14–Ge2–Ru2 113.66(17), O11–Ge3–O10 104.5(2), O13–Ge3–Ru3 112.46(17), O11–Ge3–Ru3 113.06(16).

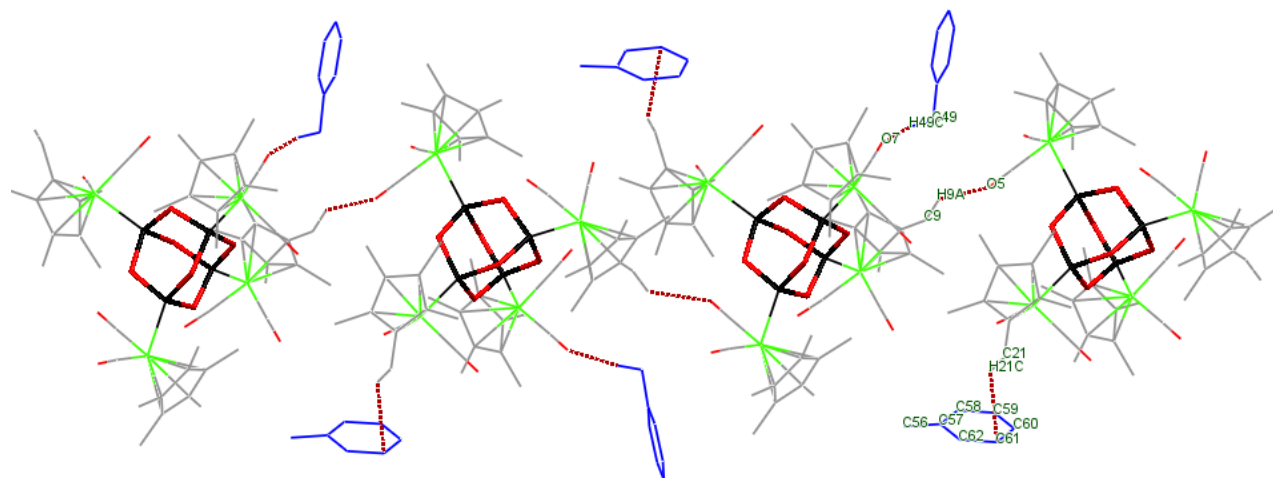

**Figure S2.** C–H... $\pi$  interaction of compound **2**, (color code: C: gray; O: red; Ge: black, Ru: green; H: gray, toluene: blue).

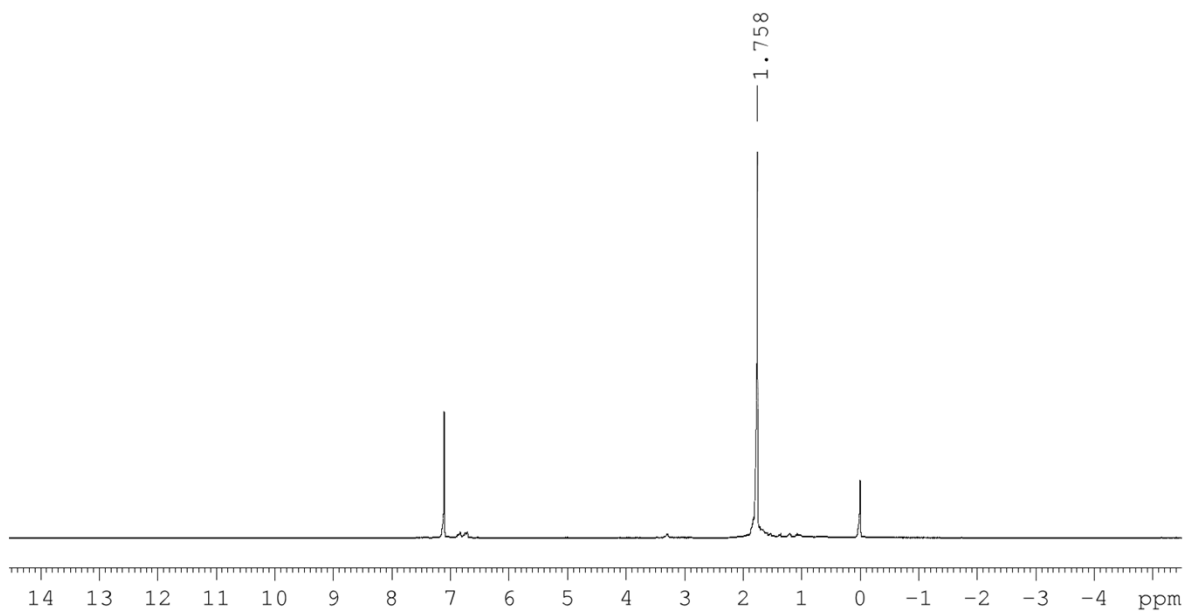

**Figure S3.**  $^1\text{H}$  NMR spectrum of **2**.

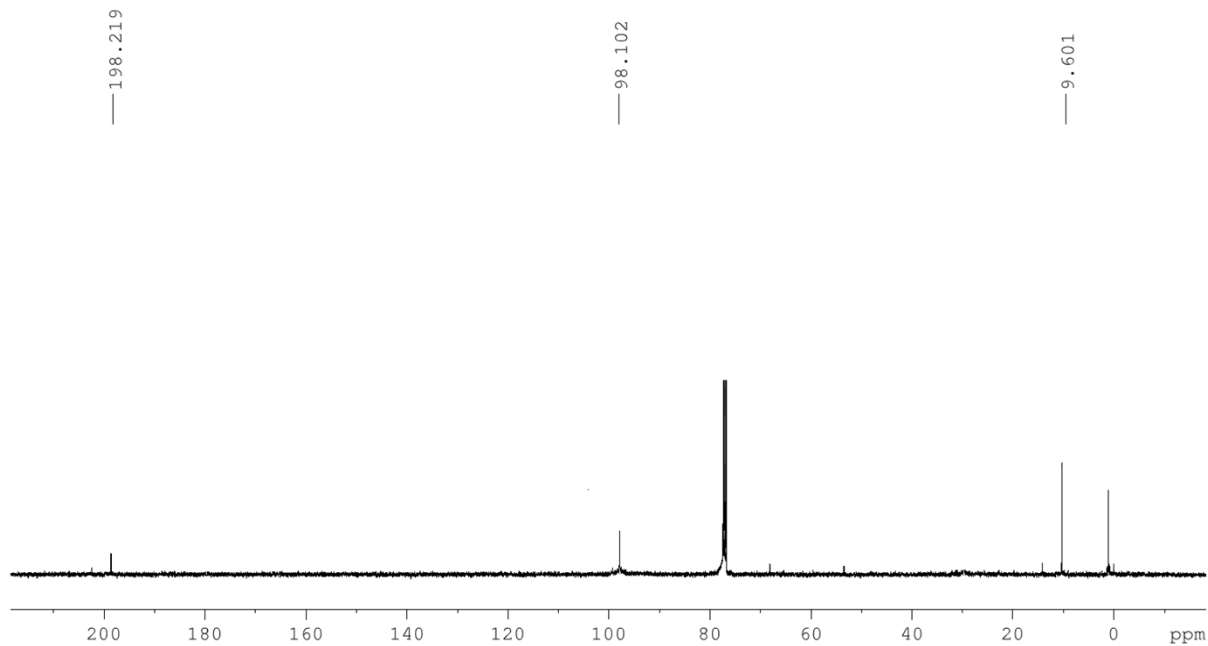

Figure S4. <sup>13</sup>C NMR spectrum of 2.

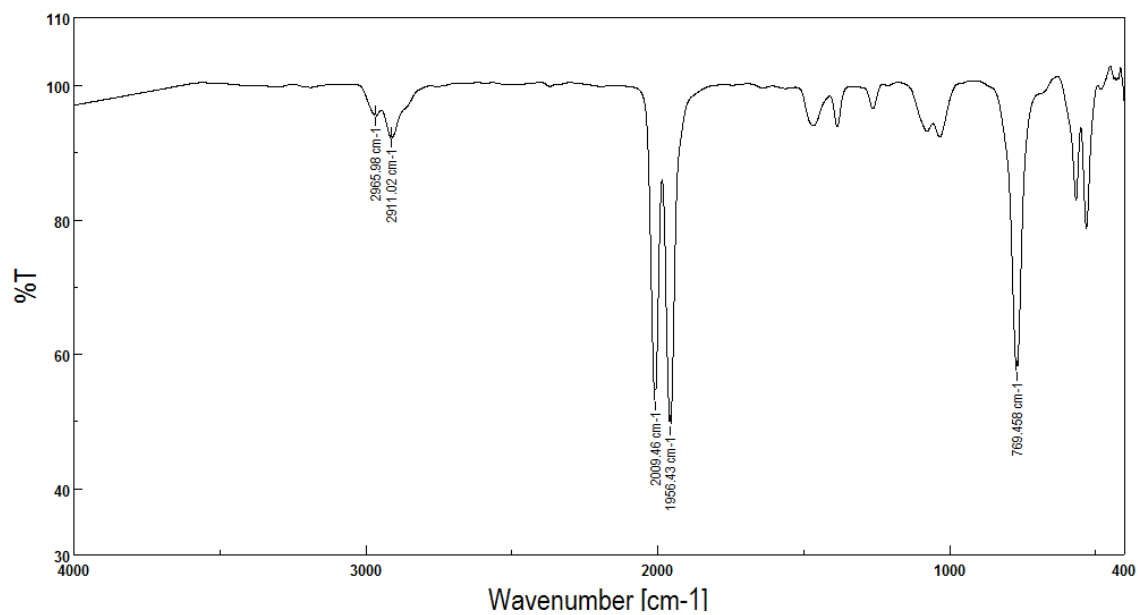

Figure S5. IR spectrum of 2.

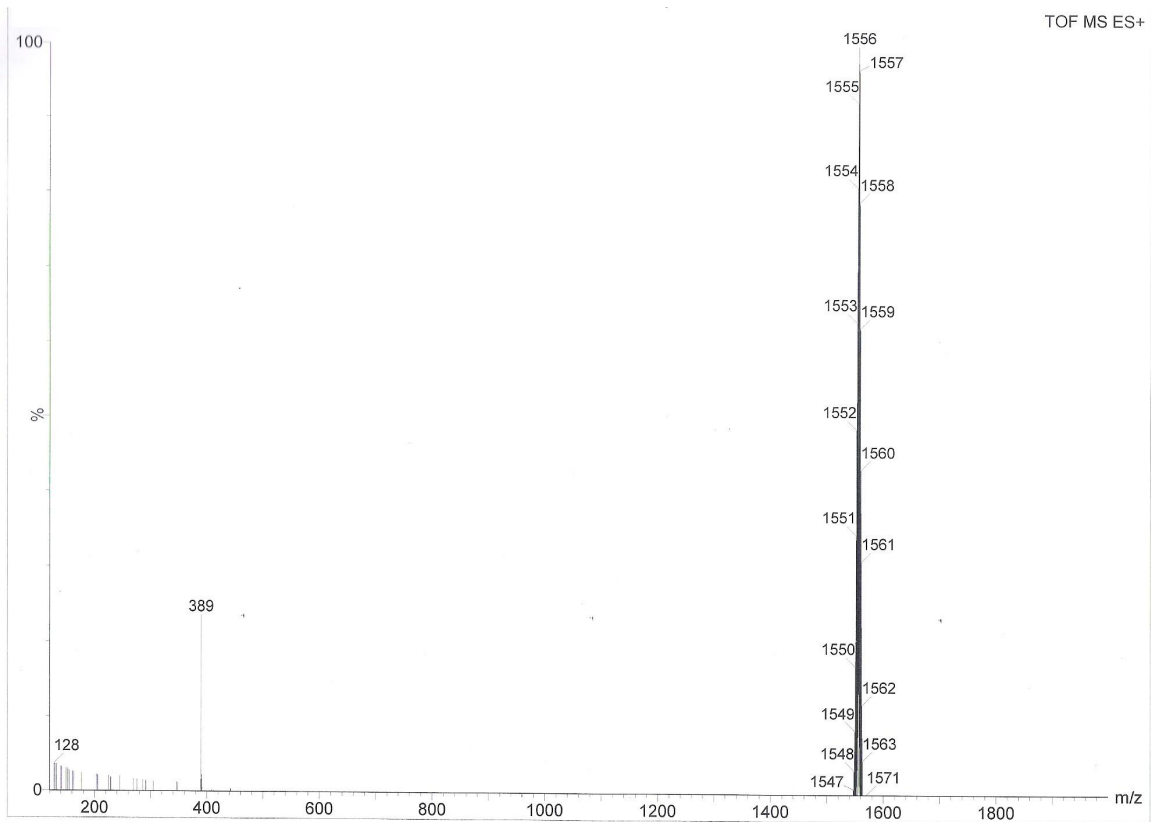

**Figure S6.** Mass spectrum of **2**.

## II Computational details

Geometry optimizations without symmetry constraints were carried out using Gaussian09<sup>1</sup> software suite. The calculations were performed using density functional theory at the BP86<sup>2</sup> level in conjunction with def2-TZVP<sup>3</sup> basis sets. The 28 core electrons of ruthenium were replaced by the quasi-relativistic effective core potential def2-ECP<sup>4</sup> for ruthenium. To save computing time all the calculations were carried out with the Cp analogue model compounds, instead of Cp\*. The model compounds were fully optimized in gaseous state (no solvent effect). Stationary points were characterized as minima by calculating the Hessian matrix analytically at the same level. Thermodynamic corrections and Kohn-Sham orbitals have been taken from these calculations. The standard state for all thermodynamic data is 298.15 K and 1 atm. NBO analysis was carried out using the NBO routine within the Gaussian09 package. For NBO analysis, BP86 functional and 6-31g\* basis set<sup>5</sup> (SDD-ECP<sup>6</sup> on Ru) was employed. Wiberg bond indexes (WBI)<sup>7</sup> and NBO second order perturbation energy values on some selected bonds are obtained on natural bond orbital (NBO) analysis.<sup>8,9</sup>

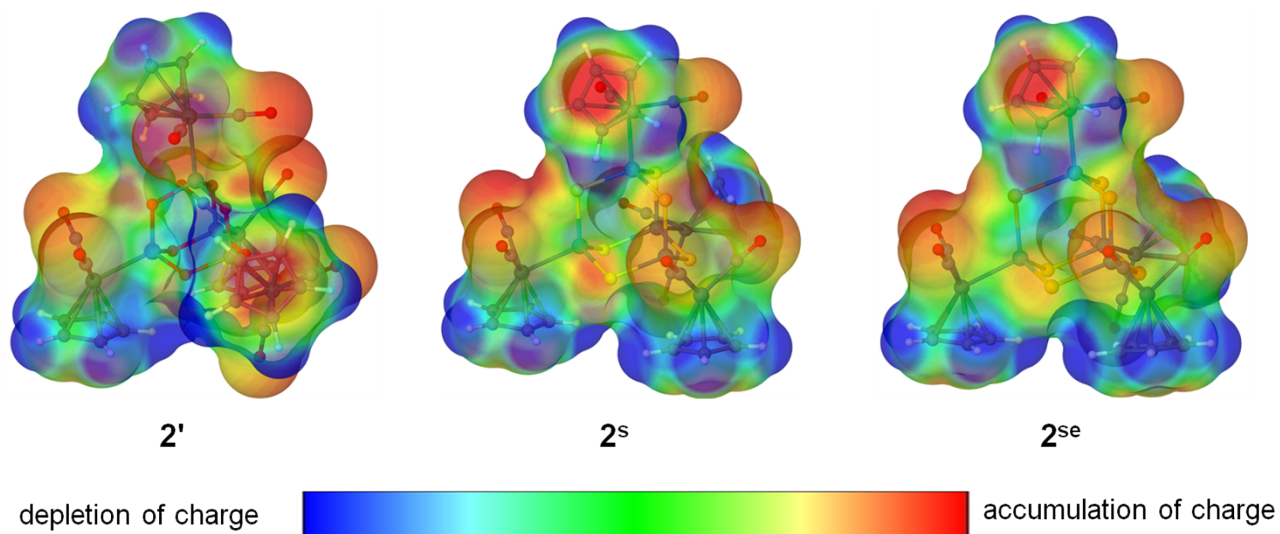

**Figure S7.** Electrostatic potential analysis of 2', 2<sup>S</sup> (S-analogue of 2) and 2<sup>Se</sup> (Se-analogue of 2).

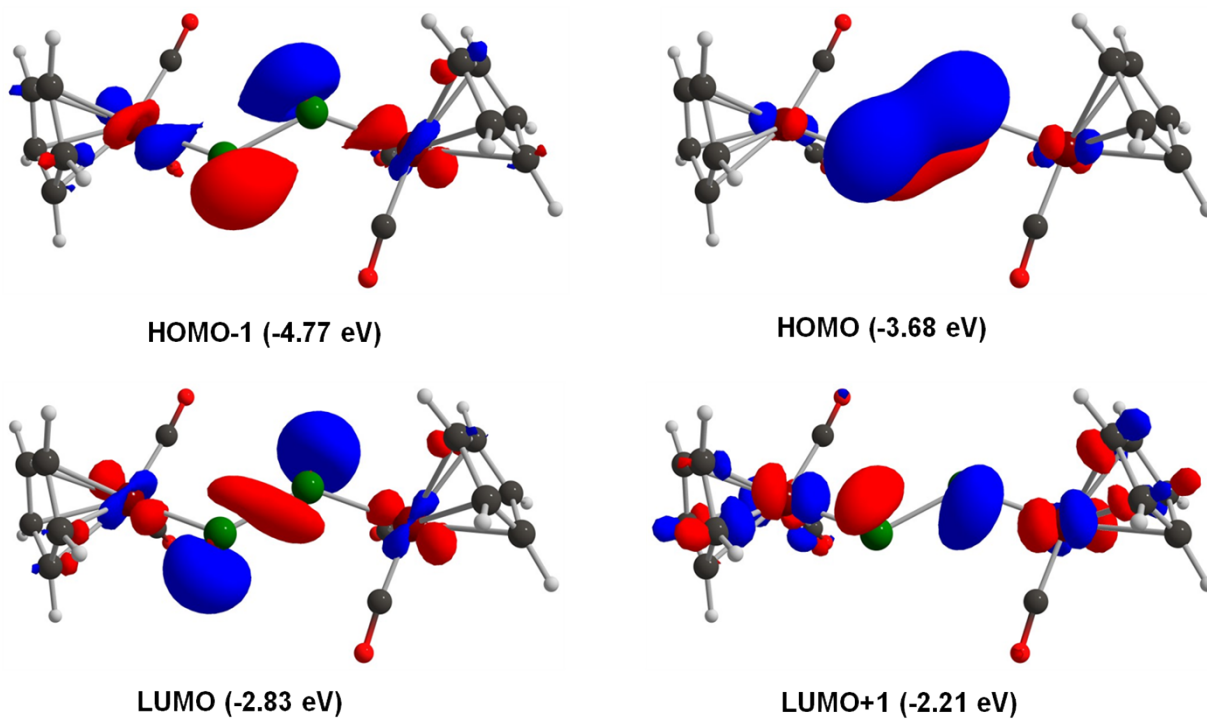

**Figure S8.** Computed Kohn–Sham (KS) MO of intermediate **B**, showing  $\pi$ -bond orthogonal to the  $\text{Ge}_2\text{Ru}_2$  plane (HOMO), slipped  $\pi$  orbital (HOMO–1) that lies in the  $\text{Ge}_2\text{Ru}_2$  plane and the LUMO+1 and LUMO represents the antibonding counterparts of these two orbitals.

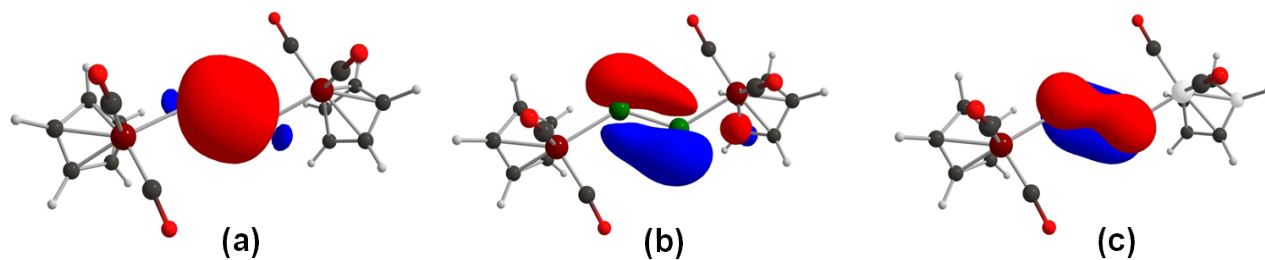

**Figure S9.** Key natural bond orbitals of **B**, showing (a)  $\sigma(\text{Ge–Ge})$ , (b) and (c)  $\pi(\text{Ge–Ge})$  bonding interactions.



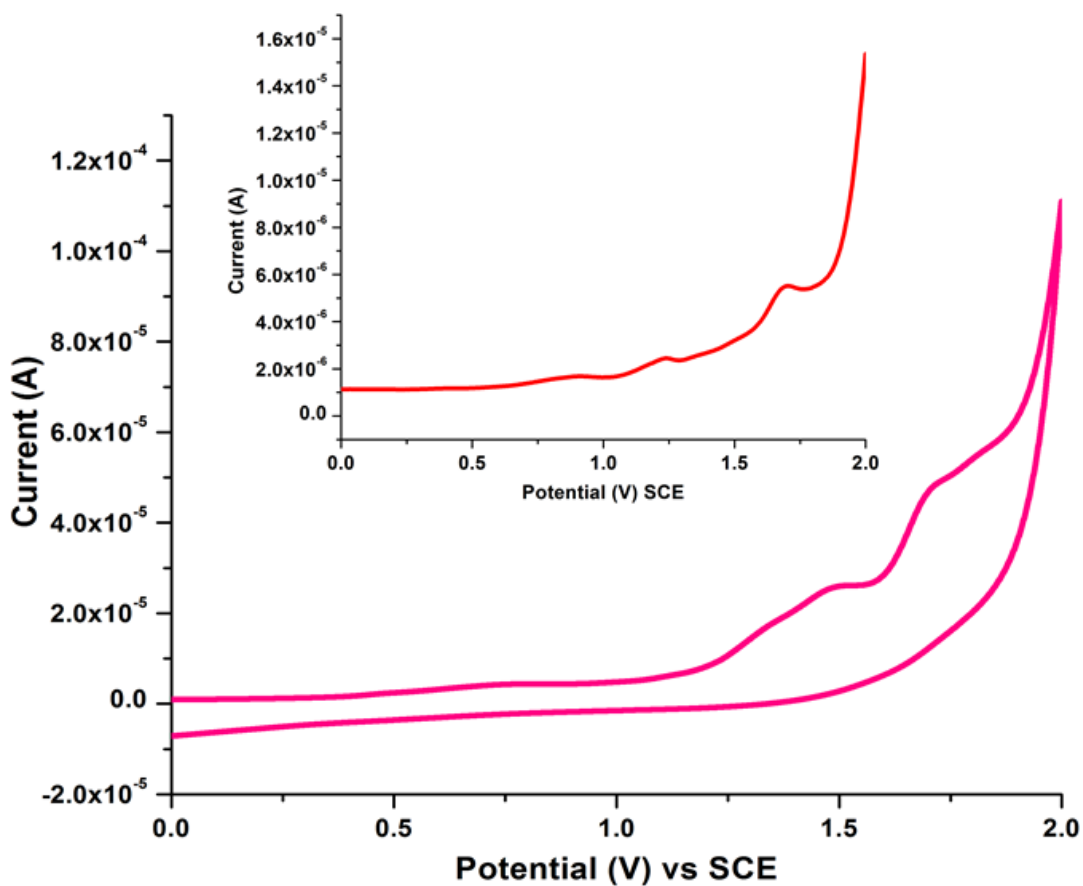

**Figure S10.** Cyclic voltammogram and differential pulse voltammogram (inset) for **2** in  $\text{CH}_3\text{CN}$  containing  $10^{-4}$  M  $[\text{n-Bu}_4\text{NPClO}_4]$ . The cyclic voltammogram and the differential pulse voltammogram are scanned from 0 to 2 V at a scan rate of 0.10 V/s.

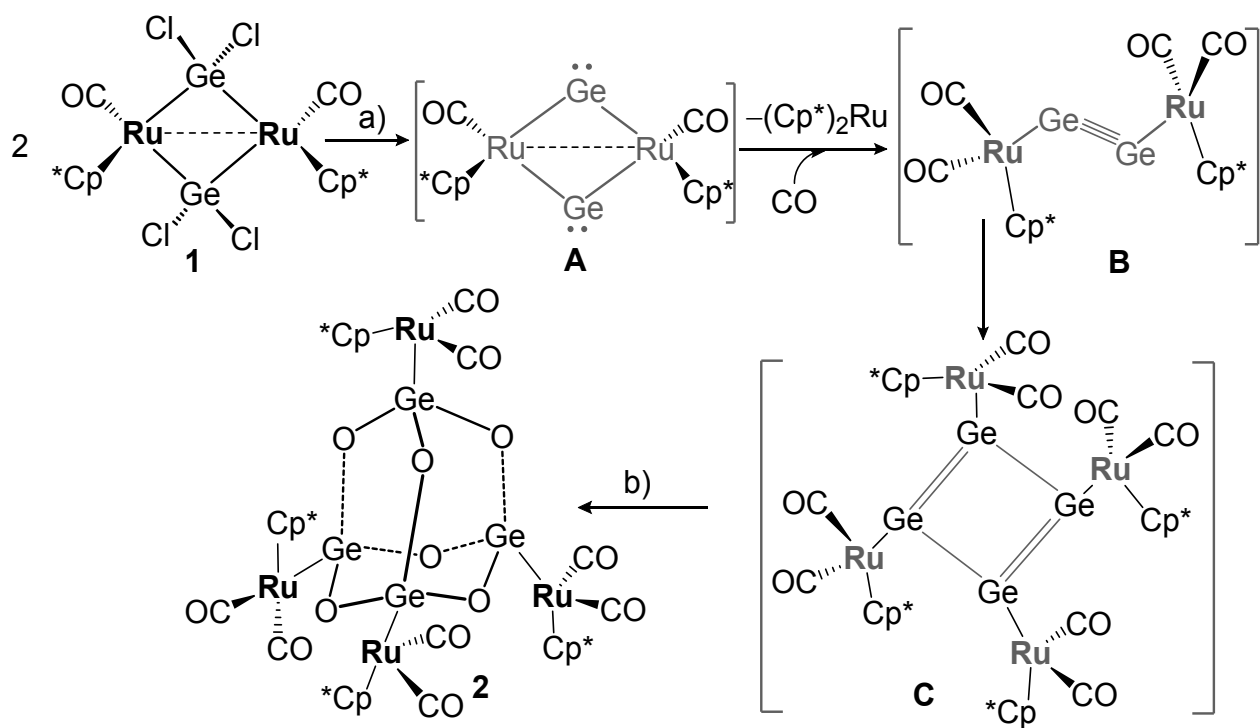

**Scheme S1.** Syntheses of tetrametallagermoxane, **2**. Key reagents: a) K metal (4.2 equiv), thf, rt, 48 h; b)  $O_2$ , thf, rt, 10 min.

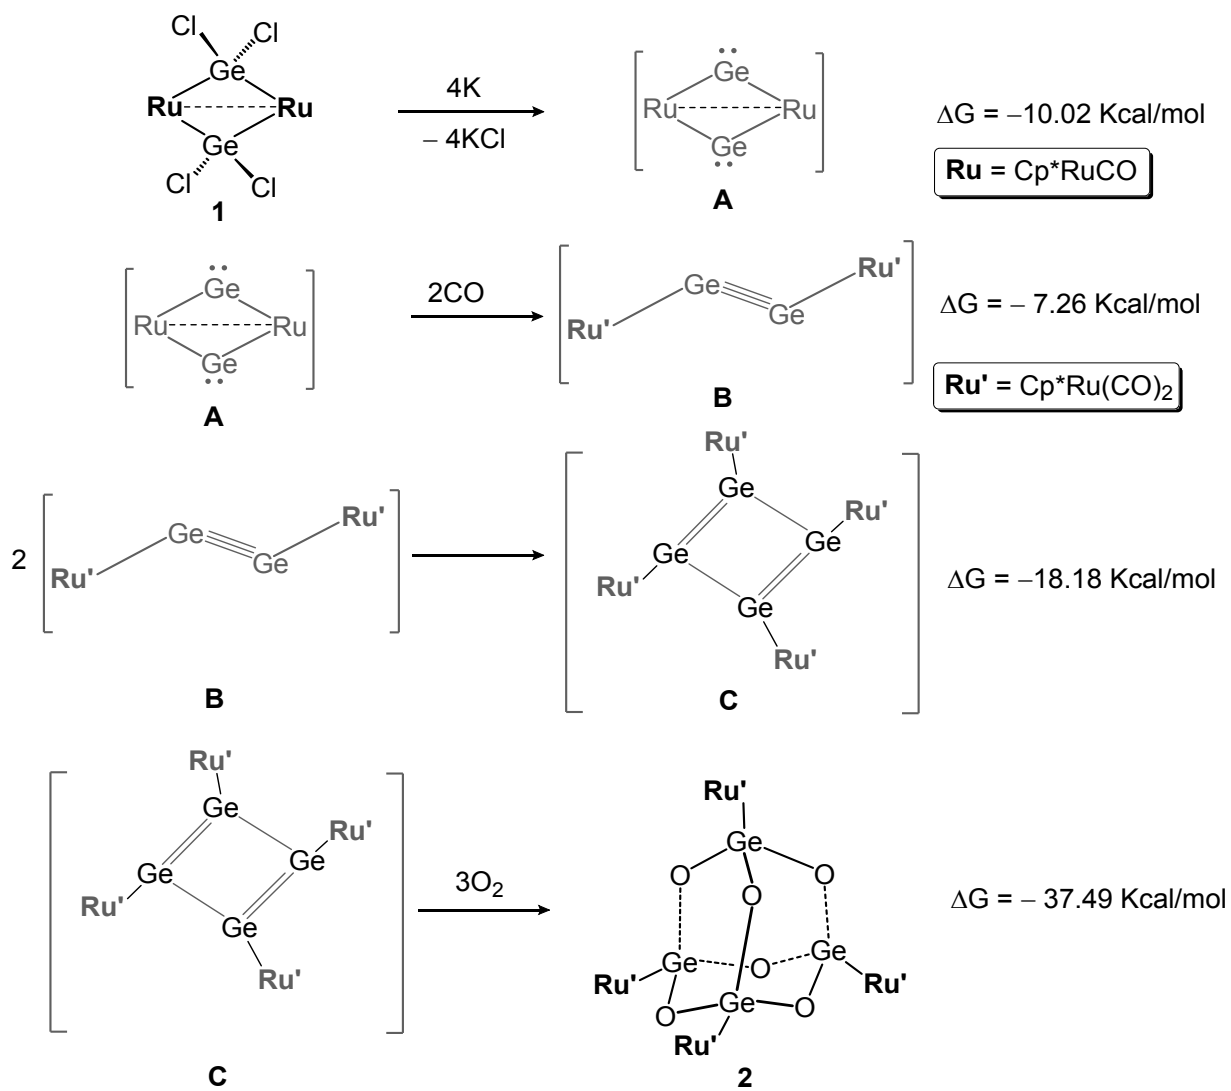

**Scheme S2.** The calculated  $\Delta G$  for each step of the proposed reaction pathway.

### III Supplementary data

**Table S1: Calculated natural charges ( $q_{\text{Ru}}$ ,  $q_{\text{Ge}}$ , and  $q_{\text{E}}$ ), natural valence population (Pop), HOMO – LUMO gaps and vertical ionization potential ( $\text{IP}_v$ ) of  $2'$ ,  $2^{\text{S}}$  and  $2^{\text{Se}}$ . The chalcogen atoms are indicated by E.**

|                                   | $q_{\text{Ru}}$ | $q_{\text{Ge}}$ | $q_{\text{E}}$ | Pop ( $\text{Ru}_{\text{val}}$ ) | Pop ( $\text{Ge}_{\text{val}}$ ) | Pop ( $\text{E}_{\text{val}}$ ) | $\Delta E_{\text{H-L}}$ (eV) | $\text{IP}_v$ (eV) |
|-----------------------------------|-----------------|-----------------|----------------|----------------------------------|----------------------------------|---------------------------------|------------------------------|--------------------|
| <b><math>2'</math></b>            | -1.098          | 1.936           | -1.150         | 9.092                            | 2.042                            | 7.144                           | 3.36                         | 7.89               |
| <b><math>2^{\text{S}}</math></b>  | -1.038          | 0.953           | -0.556         | 9.031                            | 2.999                            | 6.541                           | 2.66                         | 6.58               |
| <b><math>2^{\text{Se}}</math></b> | -1.031          | 0.705           | -0.393         | 9.024                            | 3.250                            | 6.380                           | 2.25                         | 6.32               |

$\text{IP}_v$ : The vertical ionization potential computed for the compounds  $2'$ ,  $2^{\text{S}}$  and  $2^{\text{Se}}$ , corresponds to the removal of one electron from the fixed geometry of the neutral molecule.

Cartesian coordinates of the optimized molecules along with their total energies (T.E, in hartrees) including zero point vibrational correction.

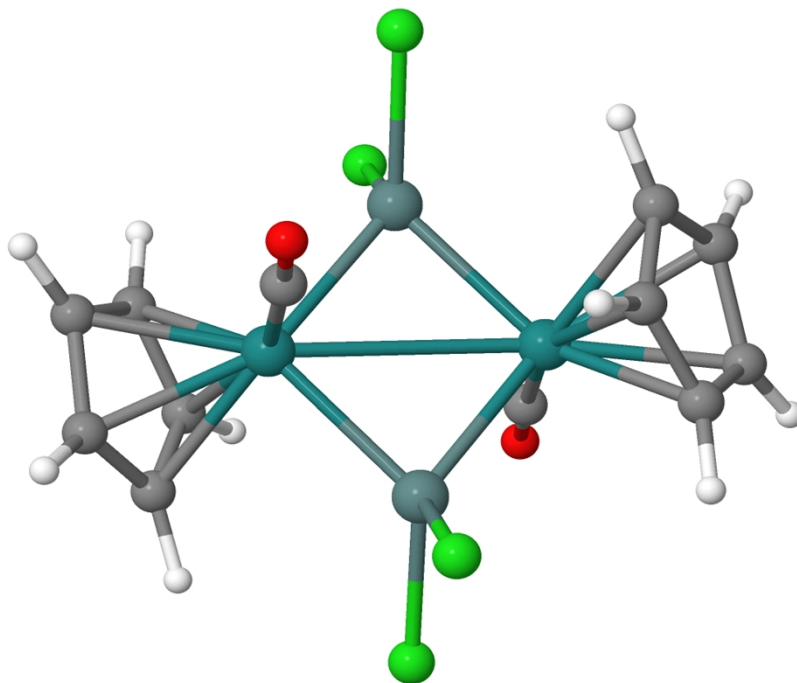

T.E = -6799.899339

**Figure S11.** Optimized geometry of **1'**.

Cartesian coordinates for the calculated structure of **1'** (in Å).

| <i>Center Number</i> | <i>Atomic Number</i> | <i>Atomic Type</i> | <i>Coordinates (Angstroms)</i> |           |           |
|----------------------|----------------------|--------------------|--------------------------------|-----------|-----------|
|                      |                      |                    | <i>X</i>                       | <i>Y</i>  | <i>Z</i>  |
| 1                    | 6                    | 0                  | 1.187697                       | -3.503071 | 0.596717  |
| 2                    | 6                    | 0                  | -0.188252                      | -3.648813 | 0.132202  |
| 3                    | 6                    | 0                  | -0.267141                      | -3.080894 | -1.185329 |
| 4                    | 6                    | 0                  | 1.033552                       | -2.562966 | -1.536453 |
| 5                    | 6                    | 0                  | 1.936656                       | -2.837176 | -0.445619 |
| 6                    | 6                    | 0                  | 0.187075                       | -1.089733 | 2.169840  |
| 7                    | 17                   | 0                  | -3.309903                      | -0.241463 | 1.659133  |
| 8                    | 17                   | 0                  | -3.197998                      | -1.078083 | -1.610018 |
| 9                    | 32                   | 0                  | -1.845612                      | -0.398965 | 0.004899  |

|    |    |   |           |           |           |
|----|----|---|-----------|-----------|-----------|
| 10 | 8  | 0 | 0.130822  | -0.914352 | 3.326071  |
| 11 | 44 | 0 | 0.308583  | -1.470994 | 0.364310  |
| 12 | 6  | 0 | -1.397357 | 3.403954  | -0.573987 |
| 13 | 6  | 0 | 0.027360  | 3.676222  | -0.414953 |
| 14 | 6  | 0 | 0.411416  | 3.232531  | 0.900269  |
| 15 | 6  | 0 | -0.750973 | 2.664612  | 1.545336  |
| 16 | 6  | 0 | -1.870442 | 2.794472  | 0.643238  |
| 17 | 6  | 0 | -0.201025 | 1.038868  | -2.188455 |
| 18 | 17 | 0 | 3.339269  | 0.224661  | -1.591454 |
| 19 | 17 | 0 | 3.144186  | 1.094657  | 1.666982  |
| 20 | 32 | 0 | 1.842702  | 0.396715  | 0.029244  |
| 21 | 8  | 0 | -0.145325 | 0.839589  | -3.325598 |
| 22 | 44 | 0 | -0.311972 | 1.470938  | -0.380757 |
| 23 | 1  | 0 | 1.579139  | -3.854793 | 1.550560  |
| 24 | 1  | 0 | 3.002505  | -2.602018 | -0.422050 |
| 25 | 1  | 0 | 1.303723  | -2.061866 | -2.470537 |
| 26 | 1  | 0 | -1.162468 | -3.022963 | -1.814393 |
| 27 | 1  | 0 | -1.001356 | -4.146589 | 0.680076  |
| 28 | 1  | 0 | 1.414748  | 3.290803  | 1.331590  |
| 29 | 1  | 0 | 0.672803  | 4.165576  | -1.148200 |
| 30 | 1  | 0 | -2.005451 | 3.650085  | -1.447373 |
| 31 | 1  | 0 | -2.896511 | 2.490600  | 0.845597  |
| 32 | 1  | 0 | -0.784708 | 2.239545  | 2.546288  |

---

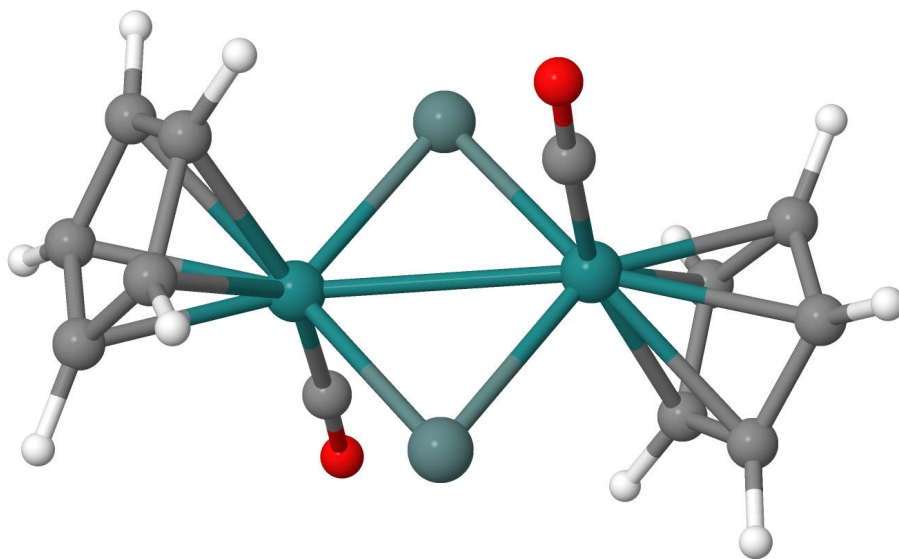

T.E = -4958.648618

**Figure S12.** Optimized geometry of **A**.

Cartesian coordinates for the calculated structure of **A** (in Å).

| <i>Center<br/>Number</i> | <i>Atomic<br/>Number</i> | <i>Atomic<br/>Type</i> | <i>Coordinates (Angstroms)</i> |           |           |
|--------------------------|--------------------------|------------------------|--------------------------------|-----------|-----------|
|                          |                          |                        | <i>X</i>                       | <i>Y</i>  | <i>Z</i>  |
| 1                        | 6                        | 0                      | -3.646788                      | 0.101528  | -0.610578 |
| 2                        | 6                        | 0                      | -3.489719                      | -0.816434 | 0.487128  |
| 3                        | 6                        | 0                      | -2.861842                      | -0.111704 | 1.557846  |
| 4                        | 6                        | 0                      | -2.625354                      | 1.235369  | 1.124091  |
| 5                        | 6                        | 0                      | -3.139185                      | 1.372518  | -0.206724 |
| 6                        | 6                        | 0                      | -0.955502                      | -1.283428 | -1.689411 |
| 7                        | 32                       | 0                      | -0.003497                      | -1.561878 | 1.181826  |
| 8                        | 8                        | 0                      | -0.703547                      | -1.976218 | -2.599923 |
| 9                        | 44                       | 0                      | -1.422012                      | -0.200962 | -0.266289 |
| 10                       | 6                        | 0                      | 3.647317                       | -0.106533 | 0.603822  |
| 11                       | 6                        | 0                      | 3.489004                       | 0.811806  | -0.493377 |
| 12                       | 6                        | 0                      | 2.856156                       | 0.108576  | -1.562144 |
| 13                       | 6                        | 0                      | 2.617839                       | -1.237958 | -1.127677 |
| 14                       | 6                        | 0                      | 3.135510                       | -1.376328 | 0.201535  |
| 15                       | 6                        | 0                      | 0.962798                       | 1.284554  | 1.691094  |
| 16                       | 32                       | 0                      | 0.002386                       | 1.565282  | -1.177410 |
| 17                       | 8                        | 0                      | 0.716446                       | 1.977598  | 2.602958  |
| 18                       | 44                       | 0                      | 1.422199                       | 0.201136  | 0.266453  |
| 19                       | 1                        | 0                      | -4.107878                      | -0.127204 | -1.567670 |
| 20                       | 1                        | 0                      | -3.146432                      | 2.284514  | -0.797631 |
| 21                       | 1                        | 0                      | -2.176359                      | 2.023836  | 1.722314  |
| 22                       | 1                        | 0                      | -2.639977                      | -0.509553 | 2.545376  |
| 23                       | 1                        | 0                      | -3.809429                      | -1.854524 | 0.501865  |
| 24                       | 1                        | 0                      | 2.632165                       | 0.506970  | -2.548970 |
| 25                       | 1                        | 0                      | 3.811090                       | 1.849145  | -0.509096 |
| 26                       | 1                        | 0                      | 4.111899                       | 0.121107  | 1.559485  |
| 27                       | 1                        | 0                      | 3.142442                       | -2.288339 | 0.792418  |
| 28                       | 1                        | 0                      | 2.165198                       | -2.025387 | -1.724525 |

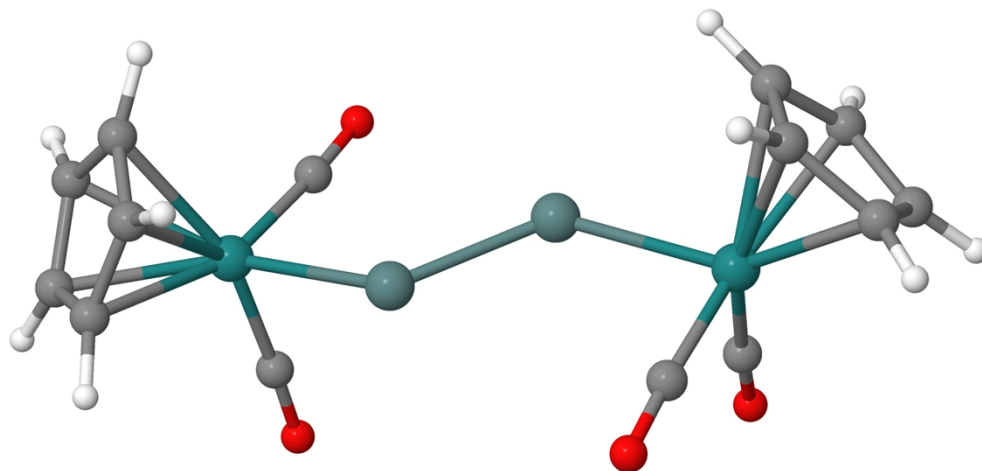

T.E = -5185.396318

**Figure S13.** Optimized geometry of **B**.

Cartesian coordinates for the calculated structure of **B** (in Å).

| <i>Center Number</i> | <i>Atomic Number</i> | <i>Atomic Type</i> | <i>Coordinates (Angstroms)</i> |           |           |
|----------------------|----------------------|--------------------|--------------------------------|-----------|-----------|
|                      |                      |                    | <i>X</i>                       | <i>Y</i>  | <i>Z</i>  |
| 1                    | 32                   | 0                  | 0.987516                       | -0.130390 | 0.618908  |
| 2                    | 32                   | 0                  | -0.971670                      | -0.175865 | -0.542096 |
| 3                    | 44                   | 0                  | -3.348043                      | 0.094477  | 0.133110  |
| 4                    | 6                    | 0                  | -4.619778                      | -0.656263 | -1.630702 |
| 5                    | 6                    | 0                  | -5.510060                      | -0.218441 | -0.585804 |
| 6                    | 6                    | 0                  | -5.304530                      | -1.054251 | 0.546055  |
| 7                    | 6                    | 0                  | -4.287049                      | -2.016240 | 0.209769  |
| 8                    | 6                    | 0                  | -3.885992                      | -1.779053 | -1.138495 |
| 9                    | 6                    | 0                  | -3.129024                      | 1.917073  | -0.180531 |
| 10                   | 6                    | 0                  | -2.694295                      | 0.316814  | 1.867352  |
| 11                   | 1                    | 0                  | -4.549838                      | -0.233966 | -2.629369 |
| 12                   | 1                    | 0                  | -6.215416                      | 0.605479  | -0.653525 |
| 13                   | 1                    | 0                  | -5.825069                      | -0.981728 | 1.497160  |
| 14                   | 1                    | 0                  | -3.909019                      | -2.801302 | 0.858793  |
| 15                   | 1                    | 0                  | -3.131664                      | -2.338302 | -1.685199 |
| 16                   | 8                    | 0                  | -3.045325                      | 3.058086  | -0.375919 |
| 17                   | 8                    | 0                  | -2.370297                      | 0.445161  | 2.974487  |
| 18                   | 44                   | 0                  | 3.344740                       | 0.086463  | -0.149094 |
| 19                   | 6                    | 0                  | 4.591873                       | -0.633835 | 1.646361  |



|    |   |   |          |           |           |
|----|---|---|----------|-----------|-----------|
| 20 | 6 | 0 | 5.491832 | -0.163571 | 0.625498  |
| 21 | 6 | 0 | 5.345514 | -1.000838 | -0.515632 |
| 22 | 6 | 0 | 4.349266 | -1.994177 | -0.207994 |
| 23 | 6 | 0 | 3.904827 | -1.775888 | 1.129130  |
| 24 | 6 | 0 | 3.136687 | 1.925005  | 0.057863  |
| 25 | 6 | 0 | 2.637435 | 0.204176  | -1.872407 |
| 26 | 1 | 0 | 4.485221 | -0.219739 | 2.645128  |
| 27 | 1 | 0 | 6.168027 | 0.682696  | 0.714150  |
| 28 | 1 | 0 | 5.890113 | -0.908869 | -1.451299 |
| 29 | 1 | 0 | 4.009001 | -2.785382 | -0.870592 |
| 30 | 1 | 0 | 3.152658 | -2.360008 | 1.652161  |
| 31 | 8 | 0 | 3.061309 | 3.076373  | 0.184648  |
| 32 | 8 | 0 | 2.279811 | 0.264986  | -2.975071 |

---

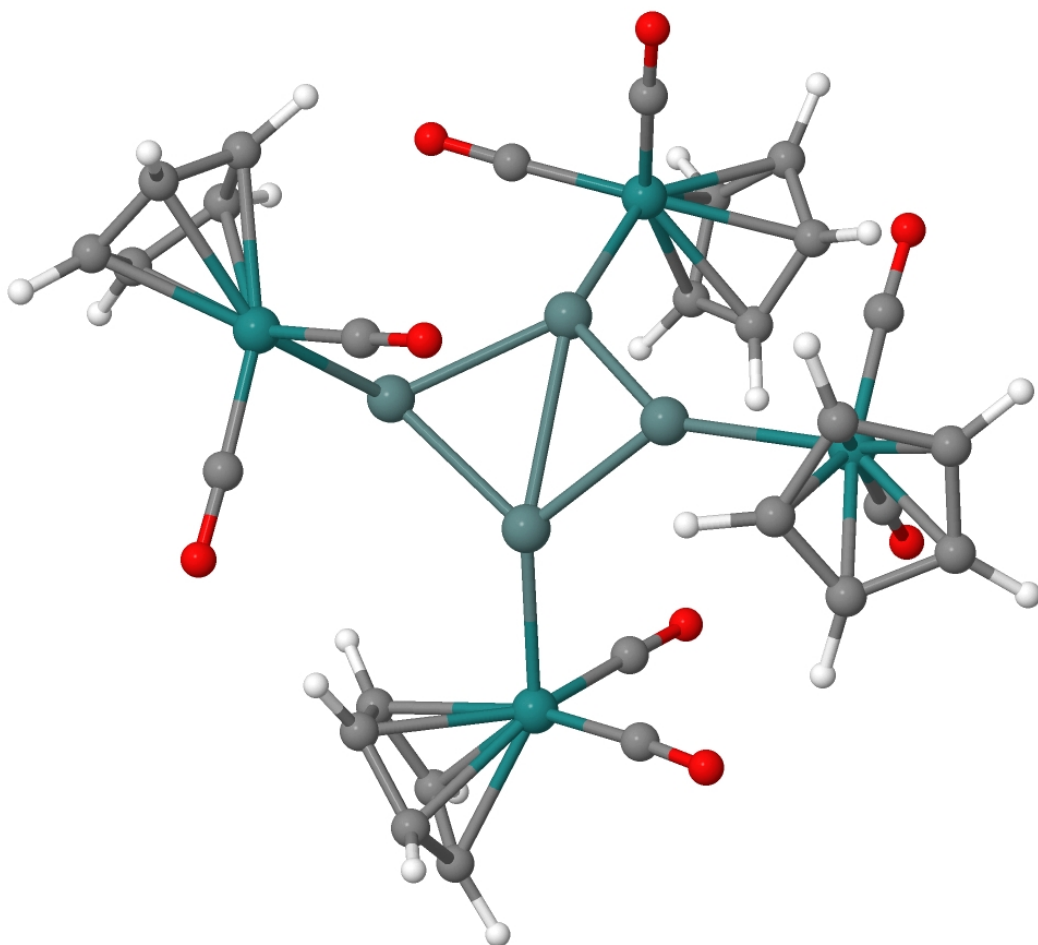

T.E = -10370.892349

**Figure S14.** Optimized geometry of C.

Cartesian coordinates for the calculated structure of C (in Å).

| -----         |               |               |                                |           |           |  |
|---------------|---------------|---------------|--------------------------------|-----------|-----------|--|
| <i>Center</i> | <i>Atomic</i> | <i>Atomic</i> | <i>Coordinates (Angstroms)</i> |           |           |  |
| <i>Number</i> | <i>Number</i> | <i>Type</i>   | <i>X</i>                       | <i>Y</i>  | <i>Z</i>  |  |
| -----         |               |               |                                |           |           |  |
| 1             | 32            | 0             | 0.126669                       | 0.228342  | -0.040343 |  |
| 2             | 32            | 0             | 0.069798                       | 0.060691  | 2.811371  |  |
| 3             | 32            | 0             | 2.066701                       | 0.225963  | 1.416611  |  |
| 4             | 32            | 0             | -1.763374                      | 1.092292  | 1.405168  |  |
| 5             | 44            | 0             | -0.397082                      | -1.447399 | 4.774190  |  |
| 6             | 6             | 0             | -1.888173                      | 0.115625  | 5.605956  |  |
| 7             | 6             | 0             | -1.183249                      | -0.469293 | 6.701278  |  |
| 8             | 6             | 0             | -1.507348                      | -1.868835 | 6.757485  |  |
| 9             | 6             | 0             | -2.391115                      | -2.144857 | 5.673560  |  |
| 10            | 6             | 0             | -2.627325                      | -0.923946 | 4.955148  |  |
| 11            | 6             | 0             | 1.422054                       | -1.445854 | 5.157555  |  |
| 12            | 6             | 0             | -0.171235                      | -2.840046 | 3.558649  |  |
| 13            | 1             | 0             | -1.871007                      | 1.163758  | 5.318696  |  |
| 14            | 1             | 0             | -0.533148                      | 0.061010  | 7.392551  |  |
| 15            | 1             | 0             | -1.145457                      | -2.583226 | 7.491396  |  |
| 16            | 1             | 0             | -2.815998                      | -3.115879 | 5.431613  |  |
| 17            | 1             | 0             | -3.264162                      | -0.801229 | 4.083306  |  |
| 18            | 8             | 0             | 2.545665                       | -1.459188 | 5.461495  |  |
| 19            | 8             | 0             | -0.073864                      | -3.742688 | 2.832901  |  |
| 20            | 44            | 0             | -0.119169                      | -1.064028 | -2.201694 |  |
| 21            | 6             | 0             | 1.462505                       | -2.736430 | -2.232062 |  |
| 22            | 6             | 0             | 0.658058                       | -2.851249 | -3.421198 |  |
| 23            | 6             | 0             | -0.678423                      | -3.131963 | -3.022166 |  |
| 24            | 6             | 0             | -0.711015                      | -3.190063 | -1.583511 |  |
| 25            | 6             | 0             | 0.618022                       | -2.966788 | -1.104895 |  |
| 26            | 6             | 0             | 0.768279                       | 0.360858  | -3.021095 |  |
| 27            | 6             | 0             | -1.746090                      | -0.189839 | -2.399796 |  |
| 28            | 1             | 0             | 2.529184                       | -2.533897 | -2.202407 |  |
| 29            | 1             | 0             | 1.011845                       | -2.743788 | -4.443051 |  |
| 30            | 1             | 0             | -1.527126                      | -3.275824 | -3.685541 |  |
| 31            | 1             | 0             | -1.580965                      | -3.408380 | -0.970682 |  |
| 32            | 1             | 0             | 0.925655                       | -2.965776 | -0.063046 |  |
| 33            | 8             | 0             | 1.320326                       | 1.218618  | -3.577101 |  |
| 34            | 8             | 0             | -2.778596                      | 0.322313  | -2.563664 |  |
| 35            | 44            | 0             | -1.943047                      | 3.672772  | 1.422322  |  |
| 36            | 6             | 0             | -2.274831                      | 4.348746  | -0.755825 |  |
| 37            | 6             | 0             | -2.462836                      | 5.490415  | 0.100553  |  |
| 38            | 6             | 0             | -3.577449                      | 5.222221  | 0.943241  |  |
| 39            | 6             | 0             | -4.090892                      | 3.919876  | 0.607244  |  |

|    |    |   |           |           |           |
|----|----|---|-----------|-----------|-----------|
| 40 | 6  | 0 | -3.294674 | 3.395343  | -0.455944 |
| 41 | 6  | 0 | -0.095522 | 3.765131  | 1.589916  |
| 42 | 6  | 0 | -2.090257 | 3.529321  | 3.262027  |
| 43 | 1  | 0 | -1.510365 | 4.244549  | -1.520976 |
| 44 | 1  | 0 | -1.859275 | 6.393828  | 0.103520  |
| 45 | 1  | 0 | -3.976297 | 5.886515  | 1.705323  |
| 46 | 1  | 0 | -4.953100 | 3.436273  | 1.058004  |
| 47 | 1  | 0 | -3.431835 | 2.435230  | -0.946880 |
| 48 | 8  | 0 | 1.056719  | 3.896697  | 1.690736  |
| 49 | 8  | 0 | -2.197393 | 3.476789  | 4.424366  |
| 50 | 44 | 0 | 4.465001  | -0.583471 | 1.491393  |
| 51 | 6  | 0 | 5.656038  | 1.356341  | 1.864376  |
| 52 | 6  | 0 | 6.590559  | 0.261902  | 1.786543  |
| 53 | 6  | 0 | 6.321336  | -0.624089 | 2.865150  |
| 54 | 6  | 0 | 5.214234  | -0.088325 | 3.614845  |
| 55 | 6  | 0 | 4.831745  | 1.147700  | 3.010851  |
| 56 | 6  | 0 | 4.412676  | -0.730845 | -0.359355 |
| 57 | 6  | 0 | 3.812155  | -2.318817 | 1.659069  |
| 58 | 1  | 0 | 5.613350  | 2.210497  | 1.194225  |
| 59 | 1  | 0 | 7.364909  | 0.137974  | 1.034122  |
| 60 | 1  | 0 | 6.850942  | -1.547596 | 3.082648  |
| 61 | 1  | 0 | 4.768603  | -0.527754 | 4.502779  |
| 62 | 1  | 0 | 4.034163  | 1.803753  | 3.349213  |
| 63 | 8  | 0 | 4.444134  | -0.830876 | -1.519555 |
| 64 | 8  | 0 | 3.463330  | -3.423656 | 1.766527  |

---

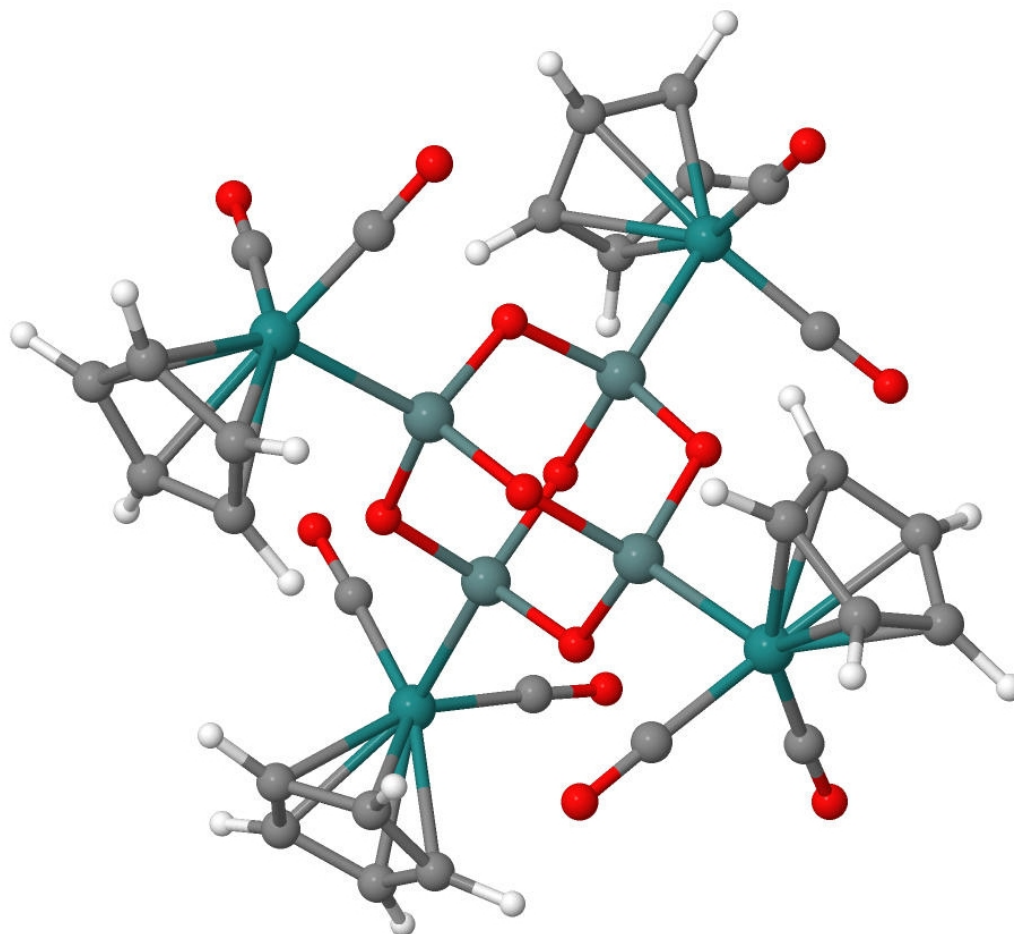

T. E = -10822.737525

**Figure S15.** Optimized geometry of **2'**.

Cartesian coordinates for the calculated structure of **2'** (in Å).

| <i>Center<br/>Number</i> | <i>Atomic<br/>Number</i> | <i>Atomic<br/>Type</i> | <i>Coordinates (Angstroms)</i> |           |           |
|--------------------------|--------------------------|------------------------|--------------------------------|-----------|-----------|
|                          |                          |                        | <i>X</i>                       | <i>Y</i>  | <i>Z</i>  |
| 1                        | 8                        | 0                      | -0.998719                      | 0.591151  | -1.775561 |
| 2                        | 8                        | 0                      | -0.593651                      | 1.742293  | 0.856279  |
| 3                        | 8                        | 0                      | 1.009827                       | -0.530000 | 1.612100  |
| 4                        | 8                        | 0                      | 0.612189                       | -1.688553 | -1.020121 |
| 5                        | 8                        | 0                      | -1.678447                      | -0.922668 | 0.592858  |
| 6                        | 8                        | 0                      | 1.680939                       | 0.975655  | -0.777261 |

|    |    |   |           |           |           |
|----|----|---|-----------|-----------|-----------|
| 7  | 32 | 0 | -1.106735 | -1.110999 | -1.127152 |
| 8  | 32 | 0 | 0.037212  | 1.766223  | -0.843875 |
| 9  | 32 | 0 | -0.688581 | 0.127190  | 1.696556  |
| 10 | 32 | 0 | 1.769763  | -0.687061 | -0.027910 |
| 11 | 44 | 0 | 0.120173  | 3.975286  | -1.889492 |
| 12 | 6  | 0 | 1.952316  | 3.759524  | -3.226170 |
| 13 | 6  | 0 | 1.493042  | 5.119915  | -3.324131 |
| 14 | 6  | 0 | 0.186930  | 5.110548  | -3.890959 |
| 15 | 6  | 0 | -0.171532 | 3.738752  | -4.145801 |
| 16 | 6  | 0 | 0.923542  | 2.912570  | -3.751345 |
| 17 | 6  | 0 | 0.766078  | 4.614483  | -0.259739 |
| 18 | 6  | 0 | -1.641194 | 4.224757  | -1.319028 |
| 19 | 1  | 0 | 2.912749  | 3.430202  | -2.841381 |
| 20 | 1  | 0 | 2.047927  | 6.002140  | -3.015442 |
| 21 | 1  | 0 | -0.428470 | 5.981569  | -4.098828 |
| 22 | 1  | 0 | -1.103566 | 3.390480  | -4.582134 |
| 23 | 1  | 0 | 0.958679  | 1.828865  | -3.821543 |
| 24 | 8  | 0 | 1.193537  | 5.052445  | 0.726060  |
| 25 | 8  | 0 | -2.743629 | 4.413012  | -1.011380 |
| 26 | 44 | 0 | -2.637250 | -2.502827 | -2.428785 |
| 27 | 6  | 0 | -4.519980 | -2.693238 | -1.152486 |
| 28 | 6  | 0 | -4.770965 | -3.348934 | -2.410786 |
| 29 | 6  | 0 | -4.692531 | -2.367949 | -3.439557 |
| 30 | 6  | 0 | -4.393193 | -1.099571 | -2.825874 |
| 31 | 6  | 0 | -4.306316 | -1.304933 | -1.413088 |
| 32 | 6  | 0 | -1.645894 | -3.992792 | -1.890319 |
| 33 | 6  | 0 | -1.502962 | -2.237677 | -3.885124 |
| 34 | 1  | 0 | -4.514890 | -3.161769 | -0.172428 |
| 35 | 1  | 0 | -4.984115 | -4.405512 | -2.548765 |
| 36 | 1  | 0 | -4.833048 | -2.544521 | -4.502669 |
| 37 | 1  | 0 | -4.277045 | -0.148489 | -3.337265 |
| 38 | 1  | 0 | -4.089334 | -0.548043 | -0.663898 |
| 39 | 8  | 0 | -1.078087 | -4.950151 | -1.565423 |
| 40 | 8  | 0 | -0.832632 | -2.074789 | -4.819865 |
| 41 | 44 | 0 | 4.032327  | -1.611116 | -0.076594 |
| 42 | 6  | 0 | 4.091662  | -3.013276 | -1.878067 |
| 43 | 6  | 0 | 5.417965  | -2.960376 | -1.317978 |
| 44 | 6  | 0 | 5.887503  | -1.621116 | -1.427772 |
| 45 | 6  | 0 | 4.857412  | -0.835825 | -2.057235 |
| 46 | 6  | 0 | 3.758769  | -1.705716 | -2.347079 |
| 47 | 6  | 0 | 3.522402  | -2.766251 | 1.301015  |
| 48 | 6  | 0 | 4.506119  | -0.301384 | 1.165429  |
| 49 | 1  | 0 | 3.457962  | -3.892601 | -1.950473 |
| 50 | 1  | 0 | 5.963195  | -3.796846 | -0.889220 |
| 51 | 1  | 0 | 6.854381  | -1.253676 | -1.094093 |
| 52 | 1  | 0 | 4.909807  | 0.223580  | -2.290251 |
| 53 | 1  | 0 | 2.821981  | -1.425179 | -2.820955 |

|    |    |   |           |           |          |
|----|----|---|-----------|-----------|----------|
| 54 | 8  | 0 | 3.248874  | -3.520047 | 2.138273 |
| 55 | 8  | 0 | 4.848356  | 0.510801  | 1.920711 |
| 56 | 44 | 0 | -1.455199 | 0.338699  | 4.002178 |
| 57 | 6  | 0 | 0.541330  | 0.537887  | 5.081414 |
| 58 | 6  | 0 | -0.499670 | 0.521016  | 6.075257 |
| 59 | 6  | 0 | -1.326295 | 1.663626  | 5.874828 |
| 60 | 6  | 0 | -0.800138 | 2.395971  | 4.751193 |
| 61 | 6  | 0 | 0.358738  | 1.709059  | 4.277927 |
| 62 | 6  | 0 | -1.812601 | -1.494620 | 3.980076 |
| 63 | 6  | 0 | -3.163046 | 0.702584  | 3.339984 |
| 64 | 1  | 0 | 1.336157  | -0.192824 | 4.964967 |
| 65 | 1  | 0 | -0.632284 | -0.235438 | 6.844443 |
| 66 | 1  | 0 | -2.195764 | 1.938014  | 6.465835 |
| 67 | 1  | 0 | -1.199538 | 3.320389  | 4.343415 |
| 68 | 1  | 0 | 0.984490  | 2.014731  | 3.443621 |
| 69 | 8  | 0 | -2.029689 | -2.633193 | 4.020568 |
| 70 | 8  | 0 | -4.233500 | 0.952600  | 2.967280 |

---

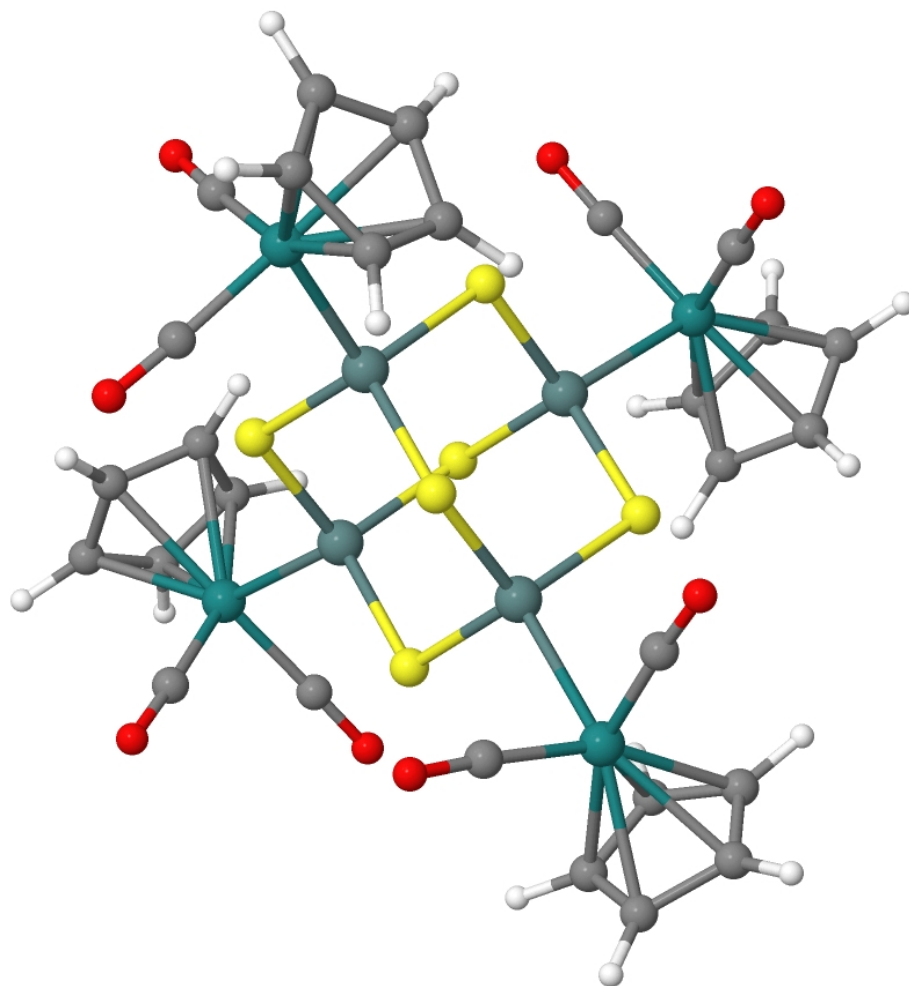

$$T. E = -24782.229097$$

**Figure S16.** Optimized geometry of **2<sup>S</sup>**.

Cartesian coordinates for the calculated structure of **2<sup>S</sup>** (in Å).

| <i>Center Number</i> | <i>Atomic Number</i> | <i>Atomic Type</i> | <i>Coordinates (Angstroms)</i> |           |           |
|----------------------|----------------------|--------------------|--------------------------------|-----------|-----------|
|                      |                      |                    | <i>X</i>                       | <i>Y</i>  | <i>Z</i>  |
| 1                    | 32                   | 0                  | 0.733014                       | 1.762466  | -1.194348 |
| 2                    | 32                   | 0                  | 0.764003                       | 0.030784  | 2.057340  |
| 3                    | 32                   | 0                  | -2.299531                      | 0.105906  | 0.039000  |
| 4                    | 32                   | 0                  | 0.565980                       | -1.901324 | -1.073176 |
| 5                    | 44                   | 0                  | 1.815260                       | 0.061775  | 4.307487  |

|    |    |   |           |           |           |
|----|----|---|-----------|-----------|-----------|
| 6  | 6  | 0 | 3.691025  | -1.228840 | 4.101067  |
| 7  | 6  | 0 | 3.630184  | -0.744607 | 5.456416  |
| 8  | 6  | 0 | 3.725742  | 0.674913  | 5.422527  |
| 9  | 6  | 0 | 3.846255  | 1.080030  | 4.044898  |
| 10 | 6  | 0 | 3.841389  | -0.098843 | 3.238351  |
| 11 | 6  | 0 | 0.519679  | -1.161648 | 4.868847  |
| 12 | 6  | 0 | 0.703761  | 1.498344  | 4.746332  |
| 13 | 1  | 0 | 3.652747  | -2.267861 | 3.786372  |
| 14 | 1  | 0 | 3.527237  | -1.356652 | 6.348546  |
| 15 | 1  | 0 | 3.709764  | 1.337528  | 6.283795  |
| 16 | 1  | 0 | 3.948782  | 2.098218  | 3.680439  |
| 17 | 1  | 0 | 3.911381  | -0.128055 | 2.153747  |
| 18 | 8  | 0 | -0.238971 | -1.941660 | 5.269956  |
| 19 | 8  | 0 | 0.064676  | 2.410287  | 5.069540  |
| 20 | 44 | 0 | 1.521965  | 3.815857  | -2.341758 |
| 21 | 6  | 0 | -0.129340 | 5.354320  | -1.973228 |
| 22 | 6  | 0 | 0.904224  | 5.984119  | -2.754608 |
| 23 | 6  | 0 | 2.095679  | 6.005445  | -1.976109 |
| 24 | 6  | 0 | 1.807523  | 5.388054  | -0.706272 |
| 25 | 6  | 0 | 0.431145  | 5.005028  | -0.705661 |
| 26 | 6  | 0 | 1.015944  | 3.041539  | -3.966776 |
| 27 | 6  | 0 | 3.217050  | 3.040891  | -2.456720 |
| 28 | 1  | 0 | -1.159649 | 5.193571  | -2.277908 |
| 29 | 1  | 0 | 0.793163  | 6.373750  | -3.763076 |
| 30 | 1  | 0 | 3.053793  | 6.415013  | -2.284727 |
| 31 | 1  | 0 | 2.502991  | 5.257551  | 0.117927  |
| 32 | 1  | 0 | -0.093970 | 4.510772  | 0.108254  |
| 33 | 8  | 0 | 0.699776  | 2.629644  | -5.002902 |
| 34 | 8  | 0 | 4.297041  | 2.622798  | -2.530735 |
| 35 | 44 | 0 | 1.400344  | -3.946786 | -2.205255 |
| 36 | 6  | 0 | 3.315471  | -3.274552 | -3.257669 |
| 37 | 6  | 0 | 3.102622  | -4.666394 | -3.560727 |
| 38 | 6  | 0 | 3.169445  | -5.400238 | -2.342823 |
| 39 | 6  | 0 | 3.424865  | -4.466208 | -1.275528 |
| 40 | 6  | 0 | 3.529451  | -3.162081 | -1.848554 |
| 41 | 6  | 0 | 0.085353  | -3.690901 | -3.509591 |
| 42 | 6  | 0 | 0.220595  | -4.944076 | -1.154022 |
| 43 | 1  | 0 | 3.336340  | -2.455101 | -3.970471 |
| 44 | 1  | 0 | 2.919811  | -5.083138 | -4.547707 |
| 45 | 1  | 0 | 3.049836  | -6.475055 | -2.236330 |
| 46 | 1  | 0 | 3.541412  | -4.710346 | -0.223379 |
| 47 | 1  | 0 | 3.714991  | -2.238221 | -1.306770 |
| 48 | 8  | 0 | -0.685758 | -3.575837 | -4.366934 |
| 49 | 8  | 0 | -0.469476 | -5.619699 | -0.511821 |
| 50 | 44 | 0 | -4.772599 | 0.074427  | 0.223235  |
| 51 | 6  | 0 | -5.394346 | -2.125832 | 0.266339  |
| 52 | 6  | 0 | -6.579899 | -1.320837 | 0.418598  |



|    |    |   |           |           |           |
|----|----|---|-----------|-----------|-----------|
| 53 | 6  | 0 | -6.456309 | -0.581656 | 1.629206  |
| 54 | 6  | 0 | -5.195094 | -0.923727 | 2.235287  |
| 55 | 6  | 0 | -4.554488 | -1.888665 | 1.397390  |
| 56 | 6  | 0 | -4.863104 | 0.468208  | -1.602650 |
| 57 | 6  | 0 | -4.710969 | 1.892042  | 0.651935  |
| 58 | 1  | 0 | -5.182557 | -2.812084 | -0.548845 |
| 59 | 1  | 0 | -7.420146 | -1.285177 | -0.269626 |
| 60 | 1  | 0 | -7.186079 | 0.118571  | 2.027245  |
| 61 | 1  | 0 | -4.805934 | -0.540740 | 3.174444  |
| 62 | 1  | 0 | -3.585133 | -2.346263 | 1.578917  |
| 63 | 8  | 0 | -4.988182 | 0.683888  | -2.734557 |
| 64 | 8  | 0 | -4.735802 | 3.012914  | 0.948864  |
| 65 | 16 | 0 | 1.409268  | -1.909376 | 1.047967  |
| 66 | 16 | 0 | 1.591688  | 1.823425  | 0.919833  |
| 67 | 16 | 0 | -1.495642 | 0.149378  | 2.171443  |
| 68 | 16 | 0 | -1.537425 | 1.894284  | -1.131992 |
| 69 | 16 | 0 | -1.697801 | -1.824527 | -1.007588 |
| 70 | 16 | 0 | 1.397167  | -0.135107 | -2.245810 |

---

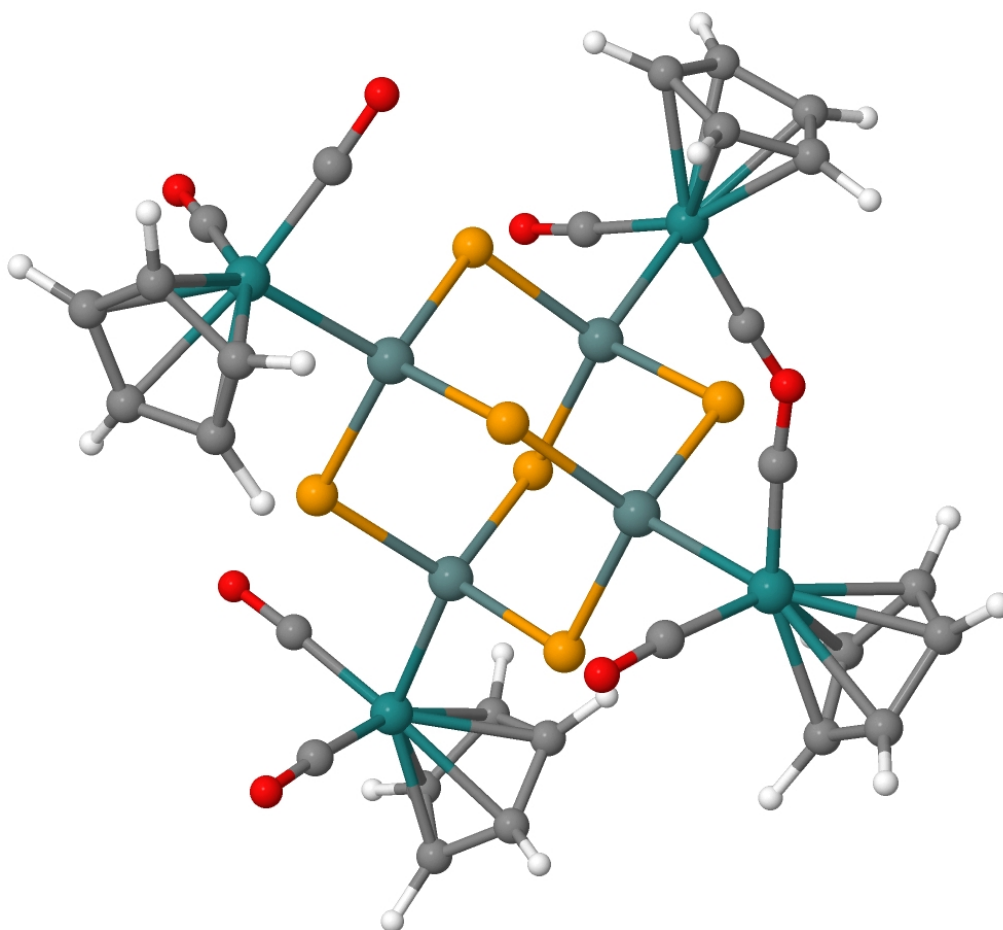

T. E = -24782.229097

**Figure S17.** Optimized geometry of **2<sup>Se</sup>**.

Cartesian coordinates for the calculated structure of **2<sup>Se</sup>** (in Å).

| <i>Center Number</i> | <i>Atomic Number</i> | <i>Atomic Type</i> | <i>Coordinates (Angstroms)</i> |           |           |
|----------------------|----------------------|--------------------|--------------------------------|-----------|-----------|
|                      |                      |                    | <i>X</i>                       | <i>Y</i>  | <i>Z</i>  |
| 1                    | 32                   | 0                  | 0.858364                       | 1.819753  | -1.257166 |
| 2                    | 32                   | 0                  | 0.822561                       | -0.009220 | 2.168497  |
| 3                    | 32                   | 0                  | -2.406066                      | 0.226071  | 0.056353  |
| 4                    | 32                   | 0                  | 0.498531                       | -2.025187 | -1.135523 |
| 5                    | 44                   | 0                  | 1.897583                       | -0.043722 | 4.419995  |
| 6                    | 6                    | 0                  | 3.718746                       | -1.417019 | 4.231647  |
| 7                    | 6                    | 0                  | 3.678136                       | -0.908620 | 5.579013  |

|    |    |   |           |           |           |
|----|----|---|-----------|-----------|-----------|
| 8  | 6  | 0 | 3.832957  | 0.505000  | 5.520891  |
| 9  | 6  | 0 | 3.970494  | 0.882042  | 4.137014  |
| 10 | 6  | 0 | 3.914965  | -0.309425 | 3.350326  |
| 11 | 6  | 0 | 0.559018  | -1.219371 | 4.983789  |
| 12 | 6  | 0 | 0.851951  | 1.432849  | 4.886916  |
| 13 | 1  | 0 | 3.640205  | -2.459310 | 3.935488  |
| 14 | 1  | 0 | 3.550517  | -1.500889 | 6.481209  |
| 15 | 1  | 0 | 3.844620  | 1.181924  | 6.371070  |
| 16 | 1  | 0 | 4.118166  | 1.888634  | 3.756241  |
| 17 | 1  | 0 | 3.983424  | -0.361172 | 2.266332  |
| 18 | 8  | 0 | -0.223428 | -1.972034 | 5.391140  |
| 19 | 8  | 0 | 0.257674  | 2.366329  | 5.233259  |
| 20 | 44 | 0 | 1.748324  | 3.851103  | -2.395904 |
| 21 | 6  | 0 | 0.186612  | 5.482205  | -2.027502 |
| 22 | 6  | 0 | 1.255756  | 6.050082  | -2.808536 |
| 23 | 6  | 0 | 2.445411  | 6.002966  | -2.028664 |
| 24 | 6  | 0 | 2.120618  | 5.405441  | -0.758104 |
| 25 | 6  | 0 | 0.724456  | 5.102901  | -0.758843 |
| 26 | 6  | 0 | 1.202928  | 3.118695  | -4.027652 |
| 27 | 6  | 0 | 3.403709  | 2.995038  | -2.518587 |
| 28 | 1  | 0 | -0.851524 | 5.384174  | -2.332337 |
| 29 | 1  | 0 | 1.168510  | 6.445264  | -3.817198 |
| 30 | 1  | 0 | 3.425947  | 6.356561  | -2.336193 |
| 31 | 1  | 0 | 2.806336  | 5.238613  | 0.067812  |
| 32 | 1  | 0 | 0.170798  | 4.640292  | 0.054910  |
| 33 | 8  | 0 | 0.867240  | 2.738466  | -5.069778 |
| 34 | 8  | 0 | 4.463809  | 2.530580  | -2.599889 |
| 35 | 44 | 0 | 1.248285  | -4.114271 | -2.270581 |
| 36 | 6  | 0 | 3.198483  | -3.559592 | -3.330454 |
| 37 | 6  | 0 | 2.917920  | -4.946253 | -3.601597 |
| 38 | 6  | 0 | 2.945699  | -5.652321 | -2.365919 |
| 39 | 6  | 0 | 3.243666  | -4.706671 | -1.320016 |
| 40 | 6  | 0 | 3.413891  | -3.423510 | -1.924138 |
| 41 | 6  | 0 | -0.041065 | -3.801704 | -3.588173 |
| 42 | 6  | 0 | 0.017792  | -5.061876 | -1.231535 |
| 43 | 1  | 0 | 3.263732  | -2.760552 | -4.063599 |
| 44 | 1  | 0 | 2.718649  | -5.377316 | -4.579170 |
| 45 | 1  | 0 | 2.772515  | -6.717012 | -2.233932 |
| 46 | 1  | 0 | 3.346093  | -4.930079 | -0.261745 |
| 47 | 1  | 0 | 3.641105  | -2.496095 | -1.403987 |
| 48 | 8  | 0 | -0.796361 | -3.656725 | -4.455117 |
| 49 | 8  | 0 | -0.703314 | -5.713651 | -0.598986 |
| 50 | 44 | 0 | -4.888061 | 0.293932  | 0.258069  |
| 51 | 6  | 0 | -5.602135 | -1.880116 | 0.323083  |
| 52 | 6  | 0 | -6.751543 | -1.022405 | 0.464272  |
| 53 | 6  | 0 | -6.598733 | -0.277434 | 1.667719  |
| 54 | 6  | 0 | -5.354480 | -0.667923 | 2.280006  |

|    |    |   |           |           |           |
|----|----|---|-----------|-----------|-----------|
| 55 | 6  | 0 | -4.755040 | -1.668123 | 1.453574  |
| 56 | 6  | 0 | -4.978179 | 0.677848  | -1.569861 |
| 57 | 6  | 0 | -4.759200 | 2.110445  | 0.676010  |
| 58 | 1  | 0 | -5.421040 | -2.585413 | -0.483271 |
| 59 | 1  | 0 | -7.587918 | -0.956433 | -0.226373 |
| 60 | 1  | 0 | -7.298251 | 0.457692  | 2.056940  |
| 61 | 1  | 0 | -4.951831 | -0.293838 | 3.217112  |
| 62 | 1  | 0 | -3.805981 | -2.165049 | 1.640612  |
| 63 | 8  | 0 | -5.109162 | 0.889733  | -2.701833 |
| 64 | 8  | 0 | -4.749332 | 3.232760  | 0.968098  |
| 65 | 34 | 0 | 1.398210  | -2.109557 | 1.113291  |
| 66 | 34 | 0 | 1.802830  | 1.850716  | 0.973626  |
| 67 | 34 | 0 | -1.565009 | 0.250739  | 2.323737  |
| 68 | 34 | 0 | -1.539889 | 2.091069  | -1.201225 |
| 69 | 34 | 0 | -1.900644 | -1.852169 | -1.067660 |
| 70 | 34 | 0 | 1.465846  | -0.209766 | -2.404776 |

---

## References

- 1 Gaussian 09, Revision C.01, M. J. Frisch, G. W. Trucks, H. B. Schlegel, G. E. Scuseria, M. A. Robb, J. R. Cheeseman, G. Scalmani, V. Barone, B. Mennucci, G. A. Petersson, H. Nakatsuji, M. Caricato, X. Li, H. P. Hratchian, A. F. Izmaylov, J. Bloino, G. Zheng, J. L. Sonnenberg, M. Hada, M. Ehara, K. Toyota, R. Fukuda, J. Hasegawa, M. Ishida, T. Nakajima, Y. Honda, O. Kitao, H. Nakai, T. Vreven, J. A. Montgomery, Jr., J. E. Peralta, F. Ogliaro, M. Bearpark, J. J. Heyd, E. Brothers, K. N. Kudin, V. N. Staroverov, T. Keith, R. Kobayashi, J. Normand, K. Raghavachari, A. Rendell, J. C. Burant, S. S. Iyengar, J. Tomasi, M. Cossi, N. Rega, J. M. Millam, M. Klene, J. E. Knox, J. B. Cross, V. Bakken, C. Adamo, J. Jaramillo, R. Gomperts, R. E. Stratmann, O. Yazyev, A. J. Austin, R. Cammi, C. Pomelli, J. W. Ochterski, R. L. Martin, K. Morokuma, V. G. Zakrzewski, G. A. Voth, P. Salvador, J. J. Dannenberg, S. Dapprich, A. D. Daniels, O. Farkas, J. B. Foresman, J. V. Ortiz, J. Cioslowski, D. J. Fox, Gaussian, Inc., Wallingford CT, 2010.
- 2 a) H. L. Schmider and A. D. Becke, *J. Chem. Phys.*, 1998, **108**, 9624; b) J. P. Perdew, *Phys. Rev. B*, 1986, **33**, 8822.
- 3 F. Weigend and R. Ahlrichs, *Phys. Chem. Chem. Phys.*, 2005, **7**, 3297.

- 4 D. Andrae, U. Häußermann, M. Dolg, H. Stoll and H. Preuss, *Theor. Chim. Acta.*, 1990, **77**, 123.
- 5 V. A. Rassolov, M. A. Ratner, J. A. Pople, P. C. Redfern and L. A. Curtiss, *J. Comput. Chem.*, 2001, **22**, 976.
- 6 M. Dolg, U. Wedig, H. Stoll and H. Preuss, *J. Chem. Phys.*, 1987, **86**, 866.
- 7 K. Wiberg, *Tetrahedron*, 1968, **24**, 1083.
- 8 F. Weinhold and C. R. Landis, *Valency and bonding: A natural bond orbital donor-acceptor perspective*. Cambridge University Press: Cambridge; U.K, 2005.
- 9 A. E. Reed, L. A. Curtiss and F. Weinhold, *Chem. Rev.*, 1988, **88**, 899.
